# Supplementary material
Source: Springer Nature journal article supplement (https://www.springermedizin.de/resource/supplementary/12960_2013_354_MOESM6_ESM.docx/9569914)
Supplement: MOESM6 [file 9569914]

| Number of nurses | 2003 | 2007 | 2008 | 2010 | 2011* |
| --- | --- | --- | --- | --- | --- |
| Total of nurses registered at the Portuguese NC | 43.978 | 50.955 | 56.859 | 62.566 | 64.535 |
| Foreign nurses registered at the Portuguese NC | 2.298 | 2.135 | 2.037 | 2.005 | 1958 |
| Spanish nurses registered at the Portuguese NC | 1.815 | 1.362 | 1.232 | 1.154 | 1133 |
| Total nurses in NHS | 35.310 | 38.260 | 38.561 | 39.522*1 | 39.686*1 |
| Spanish nurses in NHS | 1.427 | 413 | 319 | NA | NA |
